# Supplementary material
Source: PubMed Central journal article supplement (PMC3474590)
Supplement: supp_12-10222_iovs-12-10222-s01.pdf [file supp_12-10222_iovs-12-10222-s01.pdf]

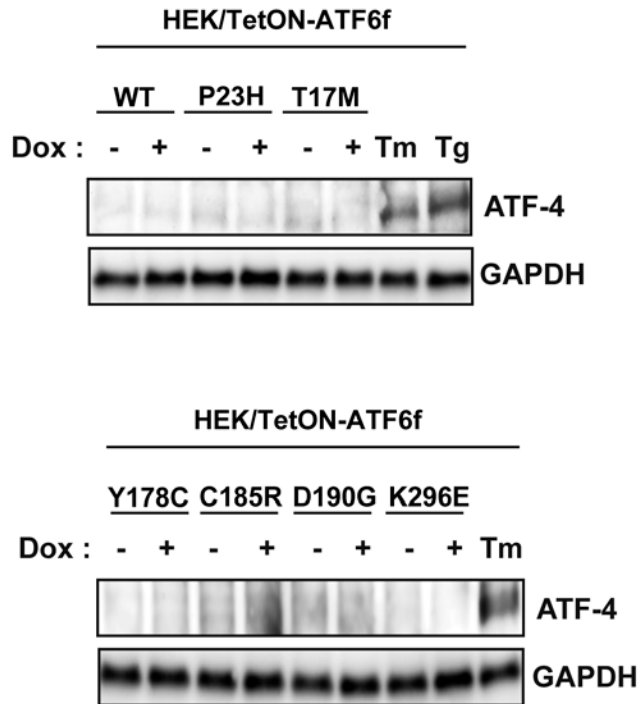

**Figure S1**

**Figure S1. Chemical-genetic activation of ATF6 does not activate PERK signaling pathway in cells expressing rhodopsin.**

WT or mutant rhodopsin was transfected into cells stably expressing a tetracycline-inducible cytosolic 373 amino acid transcriptional activator domain of ATF6 (TetON-ATF6f), and doxycycline (Dox) (1  $\mu\text{g/ml}$ ) was applied as indicated for 24 hours. Cells expressing TetON-ATF6f were also treated with tunicamycin (Tm) (5  $\mu\text{g/ml}$ ), or thapsigargin (Tg) (1  $\mu\text{M}$ ) for 6 hours as a positive control for PERK activation. Levels of ATF-4, a protein robustly induced by PERK signaling, were assessed by immunoblotting. GAPDH protein levels were assessed as a loading control.
